# Supplementary material
Source: Springer Nature journal article supplement (https://www.springermedizin.de/resource/supplementary/12971_2011_125_MOESM2_ESM.pdf/9595012)
Supplement: MOESM2 [file 9595012]

**Newly diagnosed TB Patients who smoke and volunteered to participate**

**Control Group**

**Intervention Group**

**DOTS only  
[6-months anti-TB regimen]**

**First visit**

- ☉ Received an overview of DOTS + TB counseling.
- ☉ Baseline KAB, tobacco use, smoking history and FTND were assessed.
- ☉ Encouraged to consider quitting smoking.

**TB treatment and follow-up visits**

- ☉ Patients came on daily basis to receive DOTS.
- ☉ Patients referred to nearby treatment center if having difficulty returning to the clinic.
- ☉ Necessary follow-up visits as scheduled.
- ☉ Follow-up schedules for TB on 2-monthly basis: 2<sup>nd</sup>, 4<sup>th</sup>, and 6<sup>th</sup> month.
- ☉ Overall TB treatment outcome measured at 6 months.
- ☉ HRQoL measure at baseline, 3 months and 6 months.

**SCI follow-up visits during TB follow-up visits**

- ☉ Conventional counseling on TB disease and medications compliance; but no behavioral counseling, educational materials, or smoking cessation medications were provided.
- ☉ Follow-up appointments for possible smoking cessation were done at 3 months and 6 months from the baseline.
- ☉ The above strategy is to rule-out/verify the possibility of quitting smoking even without the intervention.
- ☉ Validation of cessation via Breath CO monitoring using Micro™ – Smokerlyzer® and cotinine dip-stick test (Saliva NikAlert®).

**DOTS + SCI  
[6-months anti-TB regimen + 6-month CBT± NRT]**

**First visit**

- ☉ Received an overview of DOTS + SCI.
- ☉ Baseline KAB, tobacco use, smoking history and FTND were assessed.
- ☉ Establishment of target quit date.

**TB treatment and follow-up visits**

- ☉ Patients came on daily basis to receive DOTS.
- ☉ Patients referred to nearby treatment center if having difficulty returning to the clinic.
- ☉ Necessary follow-up visits as scheduled.
- ☉ Follow-up schedules for TB on 2-monthly basis: 2<sup>nd</sup>, 4<sup>th</sup>, and 6<sup>th</sup> month.
- ☉ Overall TB treatment outcome measured at 6 months.
- ☉ HRQoL measure at baseline, 3 months and 6 months.

**SCI follow-up visits and outcome measurements**

- ☉ Individualized behavioral counseling, educational materials, and smoking cessation medications were provided.
- ☉ Selection of NRT products (nicotine gum, patch, inhaler) was based on cigarettes consumption/day, FTND and patient's preferences.
- ☉ Patients were taught on appropriate use of the products and given a written guide.
- ☉ Duration of NRT was determined based on individual patient needs (at least 8 weeks).
- ☉ Follow-up appointments for SCI were weekly for the 1<sup>st</sup> month, fortnightly for the 2<sup>nd</sup> and 3<sup>rd</sup> month, and monthly from the 4<sup>th</sup> to 6<sup>th</sup> month.
- ☉ Validation of cessation via BreathCO using Micro™ – Smokerlyzer® and cotinine dip-stick test (Saliva NikAlert®).
